# Supplementary material for: HPTLC screening of saccharin in beverages by densitometry quantification and SERS confirmation
Source: Royal Society of Chemistry journal article supplement (doi:10.1039/d1ra09416e), 2022-01-01
Supplement: d1ra09416e1.pdf [file d1ra09416e1.pdf]

### Supplementary data

#### **HPTLC screening of saccharin in beverage by densitometry quantification and SERS confirmation**

Qifei Chen<sup>a,b</sup>, Huaming Hou<sup>b</sup>, Dan Zheng<sup>b</sup>, Xueming Xu<sup>a</sup>, Xingjun Xi<sup>\*c</sup>, Yisheng Chen<sup>a,b\*</sup>

<sup>a</sup> School of Food Science and Technology, Jiangnan University, Wuxi 214122, China

<sup>b</sup> College of Food Science and Engineering, Shanxi Agricultural University, Taigu, Shanxi 030801, China

<sup>c</sup> Sub-Institute of Agriculture and Food Standardization, China National Institute of Standardization, Beijing 100191, China

\*Corresponding author: Yisheng Chen, Xingjun Xi

E-mail address: cheniyisheng@sxau.edu.cn

**Table S1** The comparison of detection performance between the previously reported method and the proposed method in this work.

| Analytical tools           | LOD<br>(mg/kg) | Spike-<br>recovery (%) | Efficiency<br>(min/sample) | Molecular<br>fingerprint | Reference |
|----------------------------|----------------|------------------------|----------------------------|--------------------------|-----------|
| HPTLC-FLD-SERS             | 6.0            | 87.55-98.14            | 2<*                        | Yes                      | This work |
| HPLC-Fluorescence          | 4.4            | 98.5-101.4             | >8                         | N/A                      | [1]       |
| CE-conductivity detection  | 1.5            | 94-108                 | >6                         | N/A                      | [2]       |
| Polypyrrole-doped membrane | 65.9           | 101.5-102.0            | <3                         | N/A                      | [3]       |

\*Calculated as 20 bands were simultaneously separated and evaluated on a plate.

[1] Bruno SNF, Cardoso CR, Maciel MMA, Vokac L, da Silva Junior AI. Selective identification and quantification of saccharin by liquid chromatography and fluorescence detection. *Food Chem* 2014;159:309-15.

[2] Bergamo AB, Fracassi da Silva JA, de Jesus DP. Simultaneous determination of aspartame, cyclamate, saccharin and acesulfame-K in soft drinks and tabletop sweetener formulations by capillary electrophoresis with capacitively coupled contactless conductivity detection. *Food Chem* 2011;124:1714-7.

[3] Álvarez-Romero GA, Lozada-Ascencio SM, Rodríguez-Ávila JA, Galán-Vidal CA, Páez-Hernández ME. Potentiometric quantification of saccharin by using a selective membrane formed by pyrrole electropolymerization. *Food Chem* 2010;120:1250-4.
